# Supplementary material for: Birth and Rapid Subcellular Adaptation of a Hominoid-Specific CDC14 Protein
Source: PLOS journal article supplement (doi:10.1371/journal.pbio.0060140), 2008-06-04

|                         |                          |       |
|-------------------------|--------------------------|-------|
| N-Terminal<br>CDC14Bpar | Core Domain<br>CDC14Bpar | DsRed |
|-------------------------|--------------------------|-------|

DAPI                      CDC14Bpar  
                                 lacking C-Terminal Domain                      Merge

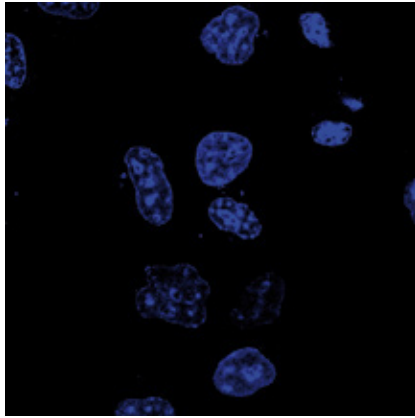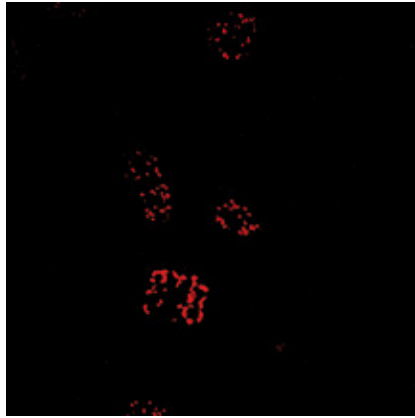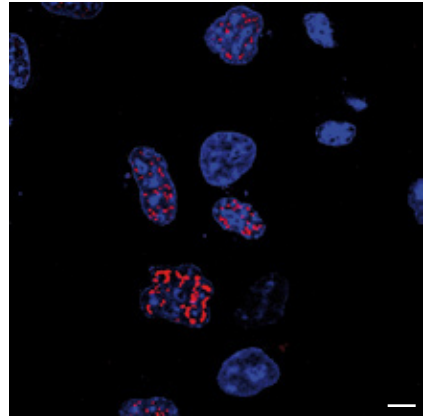

Supplement: S2 (10.1371/journal.pbio.0060140.s002) [file journal.pbio.0060140.s002]
