# Supplementary figures and images for: Birth and Rapid Subcellular Adaptation of a Hominoid-Specific CDC14 Protein
Source: PLOS journal article supplement (doi:10.1371/journal.pbio.0060140), 2008-06-04

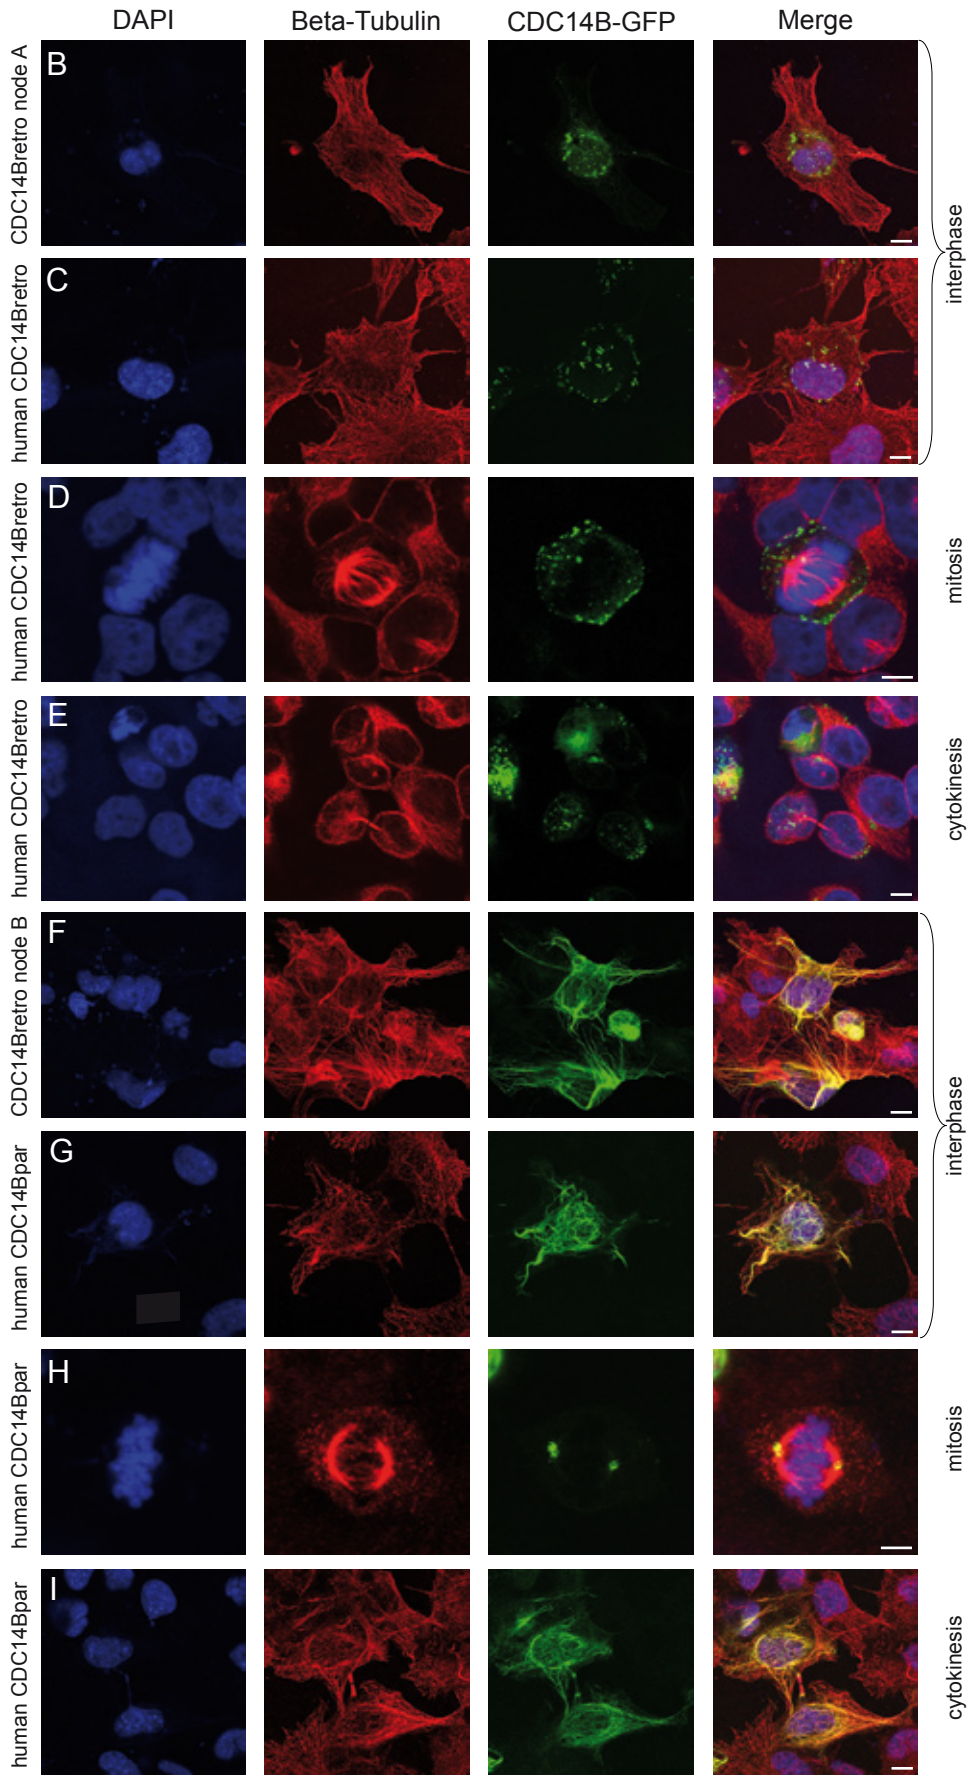

Supplement: S3 (10.1371/journal.pbio.0060140.s003) [file journal.pbio.0060140.s003]

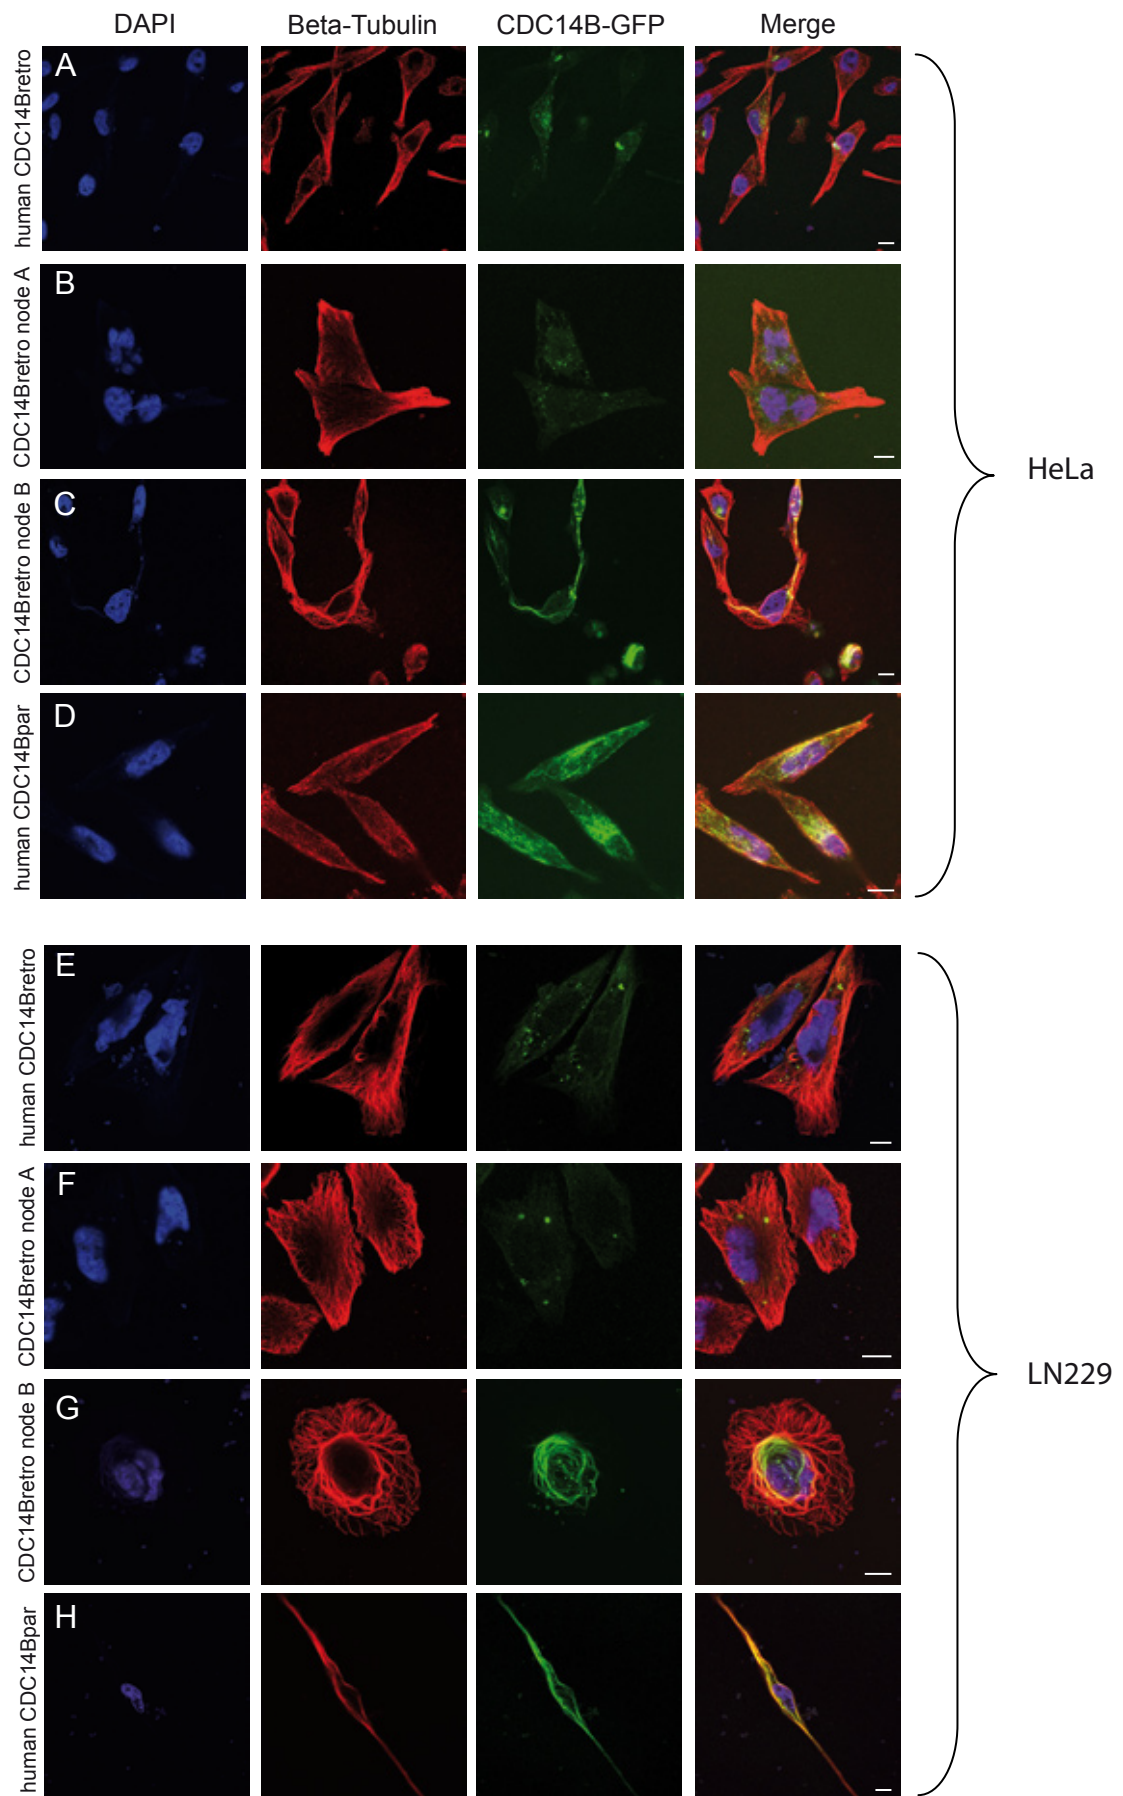

Supplement: S4 (10.1371/journal.pbio.0060140.s004) [file journal.pbio.0060140.s004]
